# Supplementary material for: Side chain modification: an effective approach to modulate the energy level of benzodithiophene based polymers for high-performance solar cells
Source: Royal Society of Chemistry journal article supplement (doi:10.1039/c5ta05096k), 2015-01-01
Supplement: c5ta05096k1.pdf [file c5ta05096k1.pdf]

**Side Chain Modification: An Effective Approach to Modulate the Energy Level  
of Benzodithiophene Based Polymer for High-Performance Solar Cells**

*Haimei Wu,<sup>a, †</sup> Baofeng Zhao,<sup>a, b, †</sup> Weiping Wang,<sup>a</sup> Zhaoqi Guo,<sup>a</sup> Wei Wei,<sup>c</sup>*

*Zhongwei An,<sup>a</sup> Chao Gao,<sup>a,\*</sup> Hui Chen,<sup>b</sup> Biao Xiao,<sup>b</sup> Yuan Xie,<sup>b</sup> Hongbin Wu,<sup>b,\*</sup>*

*Yong Cao<sup>b</sup>*

<sup>a</sup> *Centre of Optoelectronic Materials, Xi'an Modern Chemistry Research Institute, Xi'an, 710065, China. E-Mail: chaogao1974@hotmail.com (C. Gao).*

<sup>b</sup> *Institute of Polymer Optoelectronic Materials and Devices, State Key Laboratory of Luminescent Materials and Devices, South China University of Technology, Guangzhou, 510640, China. E-Mail: hbwu@scut.edu.cn (H. Wu).*

<sup>c</sup> *Nanjing University of Posts and Telecommunications, Nanjing, 210003, China.*

<sup>†</sup> *These authors contributed equally to this work.*

**Content**

| Content                                                            | Page  |
|--------------------------------------------------------------------|-------|
| <sup>1</sup> H NMR and <sup>13</sup> C NMR Spectra of the monomers | 2-5   |
| TGA curves                                                         | 5     |
| Absorption spectra                                                 | 6     |
| J-V properties of PSCs with various D/A ratios and SVA.            | 7-10  |
| Hole mobilities measurements of the polymers                       | 11-14 |

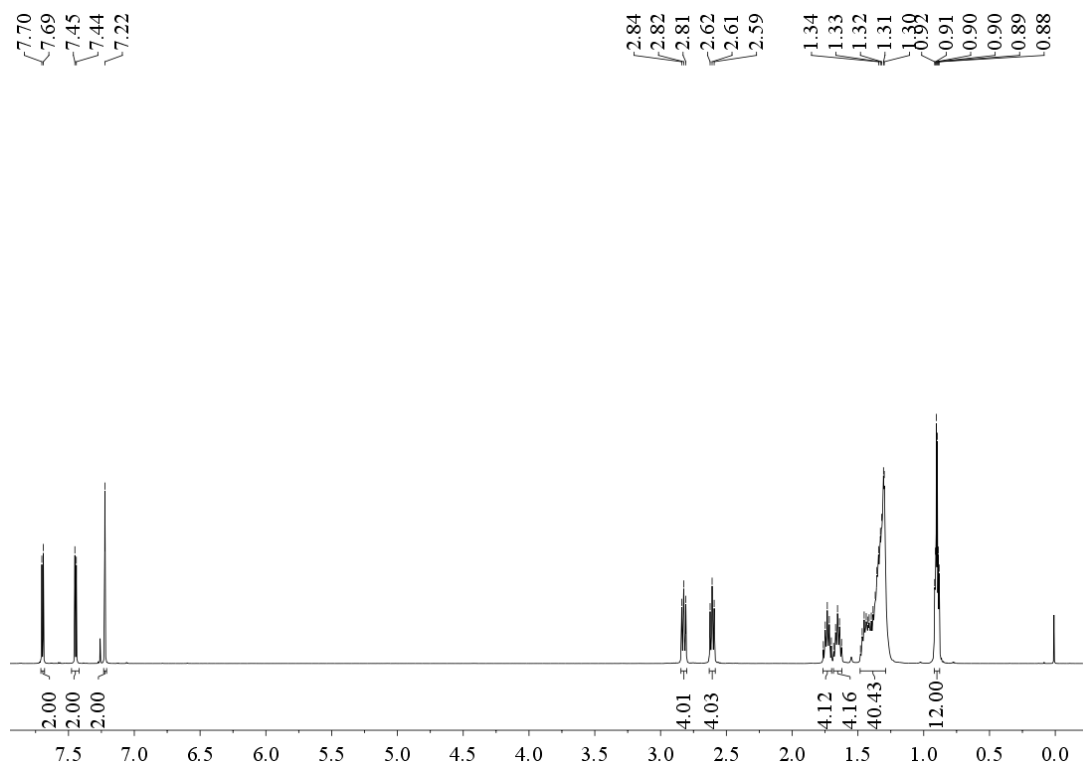

**Figure S1.** The  $^1\text{H}$  NMR spectrum of compound 1b.

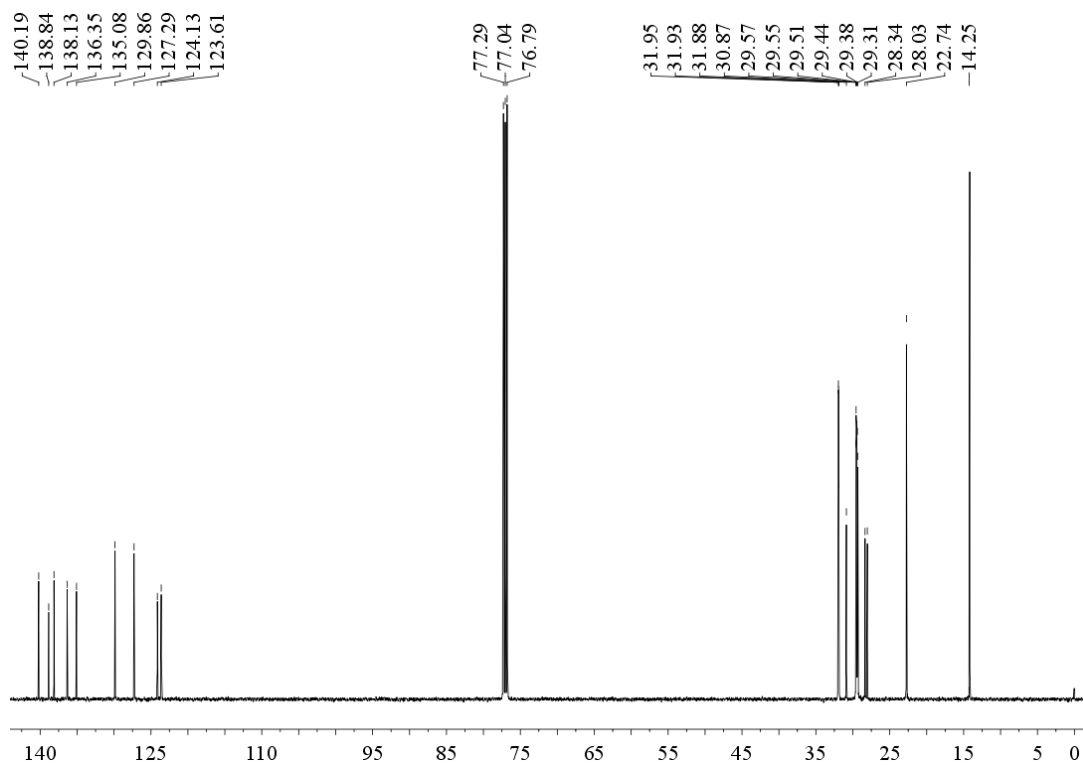

**Figure S2.** The  $^{13}\text{C}$  NMR spectrum of compound 1b.

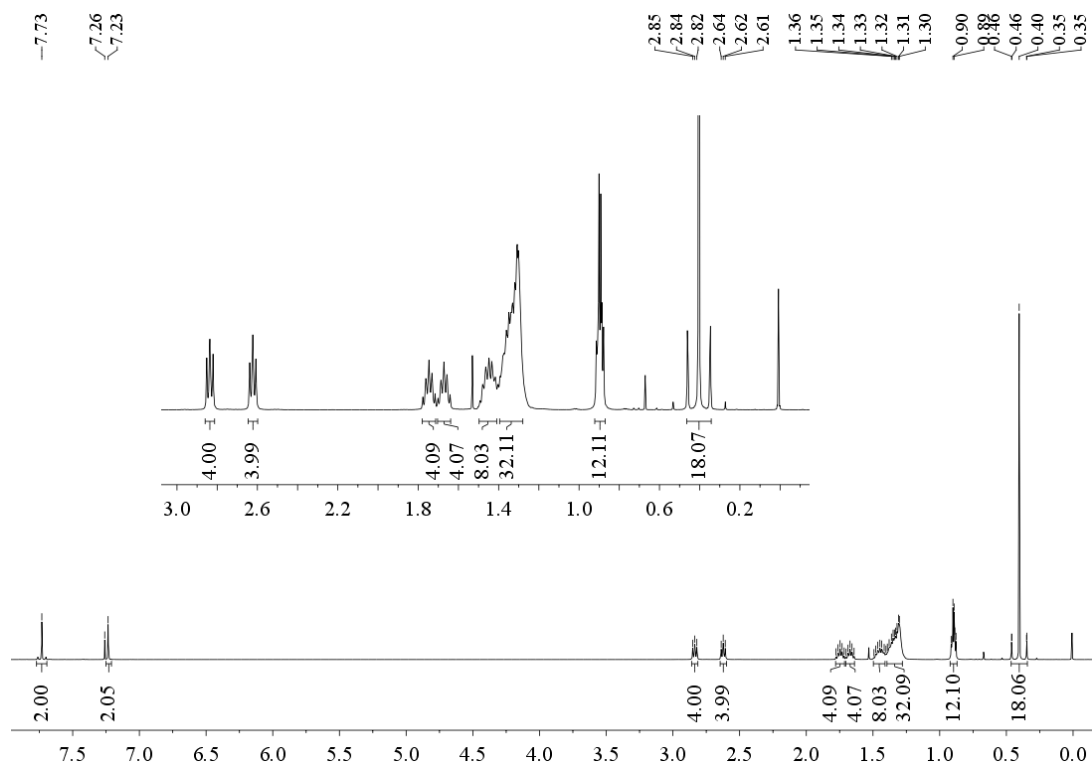

**Figure S3.** The  $^1\text{H}$  NMR spectrum of compound 2b.

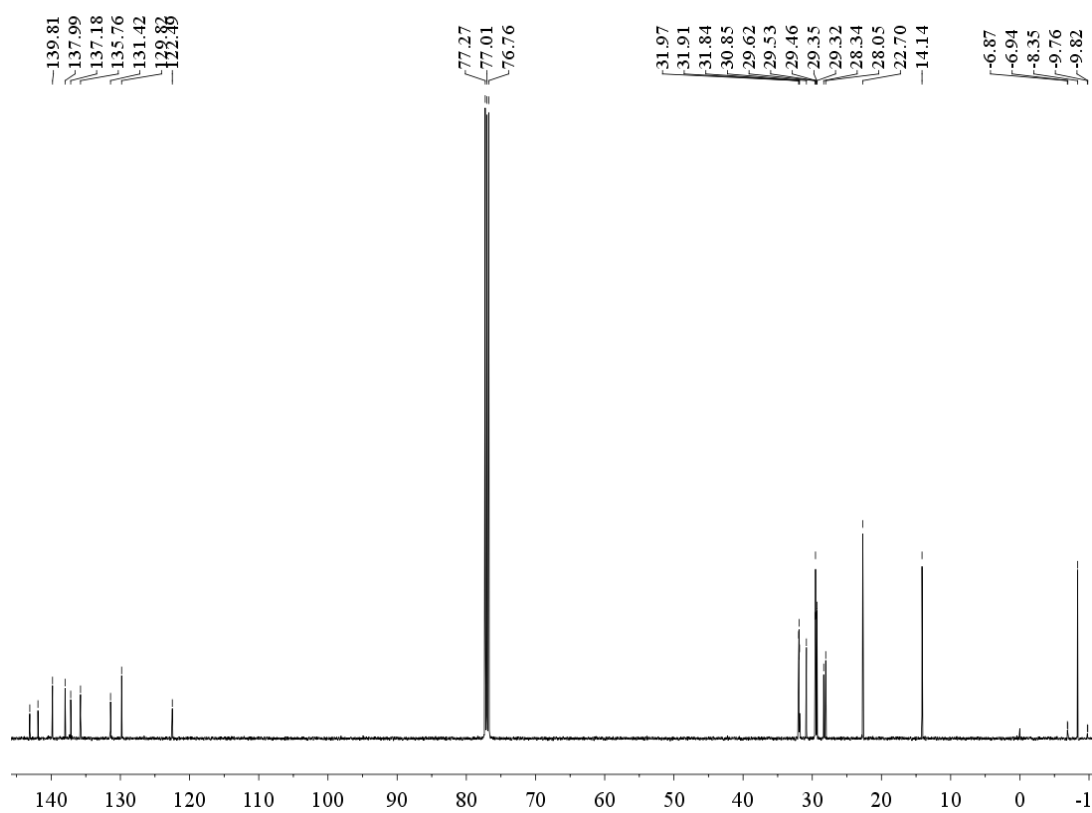

**Figure S4** The  $^{13}\text{C}$  NMR spectrum of compound 2b.

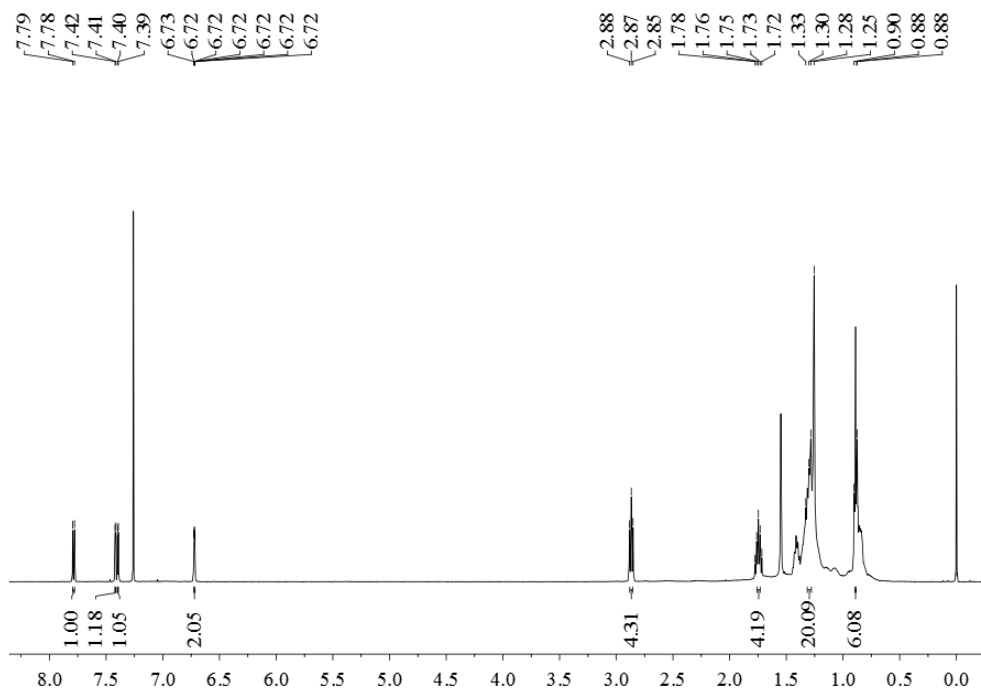

**Figure S5** The  $^1\text{H}$  NMR spectrum of compound 6.

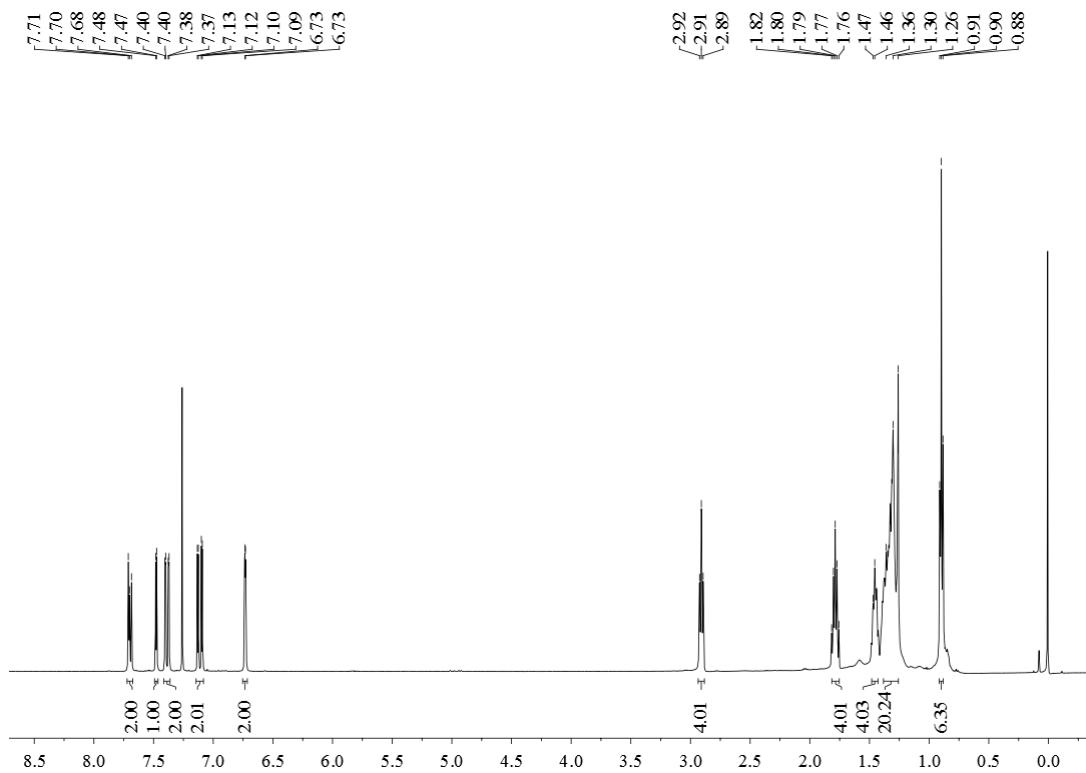

**Figure S6** The  $^1\text{H}$  NMR spectrum of compound 8.

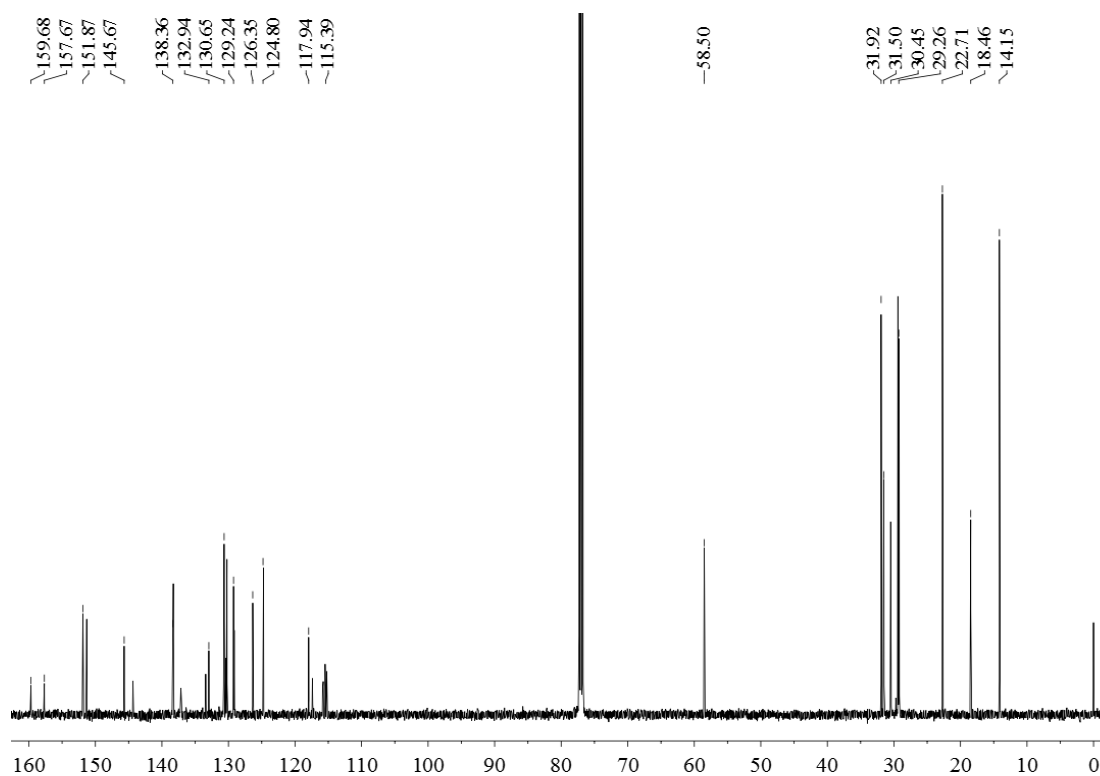

**Figure S7** The  $^{13}\text{C}$  NMR spectrum of compound 8.

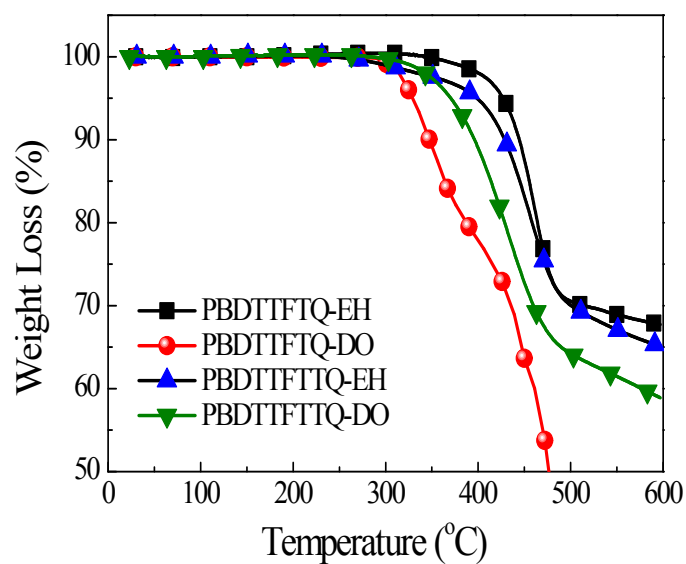

**Figure S8.** Thermalgravimetric analysis curves of polymers with a heating rate of 10 °C/min in nitrogen.

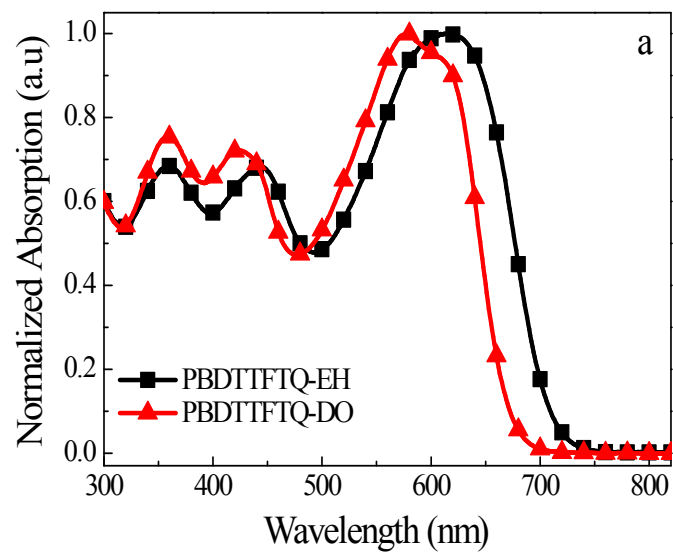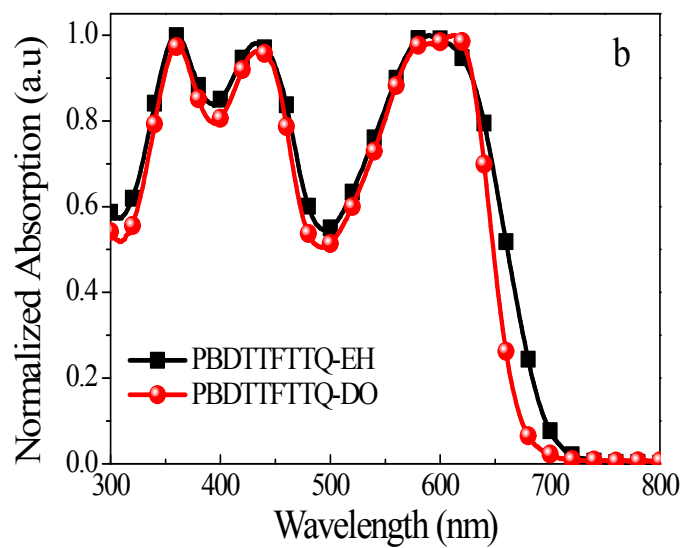

**Figure S9.** The UV-vis absorption spectra of polymers in  $\text{CHCl}_3$ , (a) PBDTTFTQ-EH and PBDTTFTQ-DO, (b) PBDTTFTTQ-EH and PBDTTFTTQ-DO

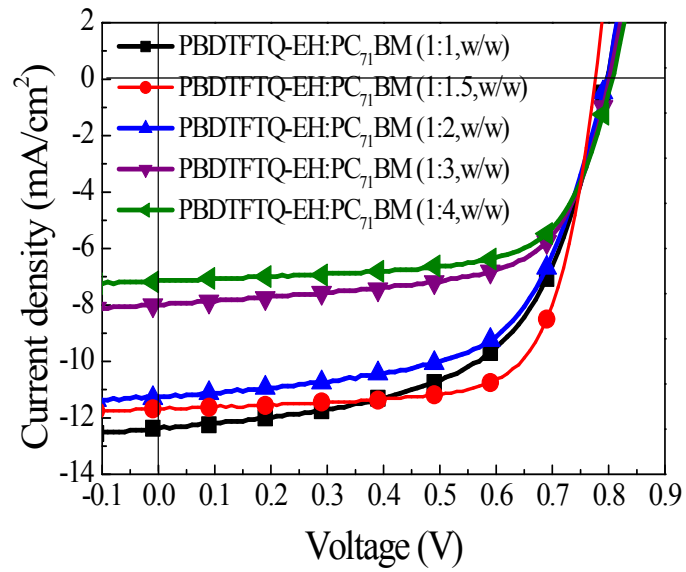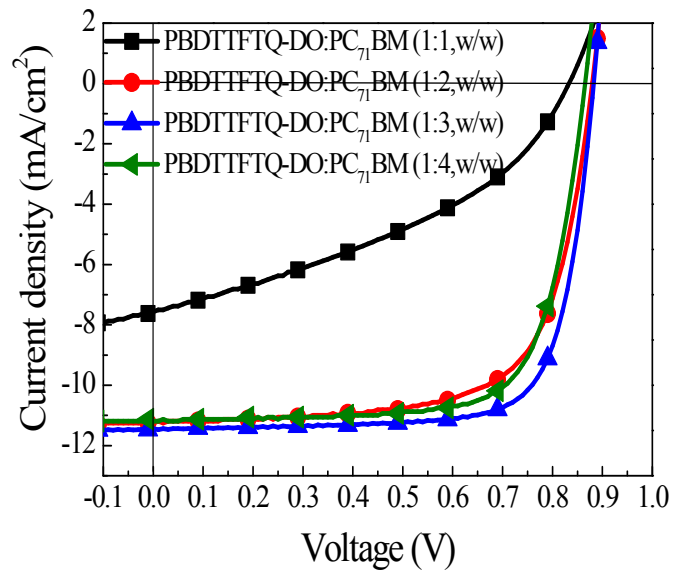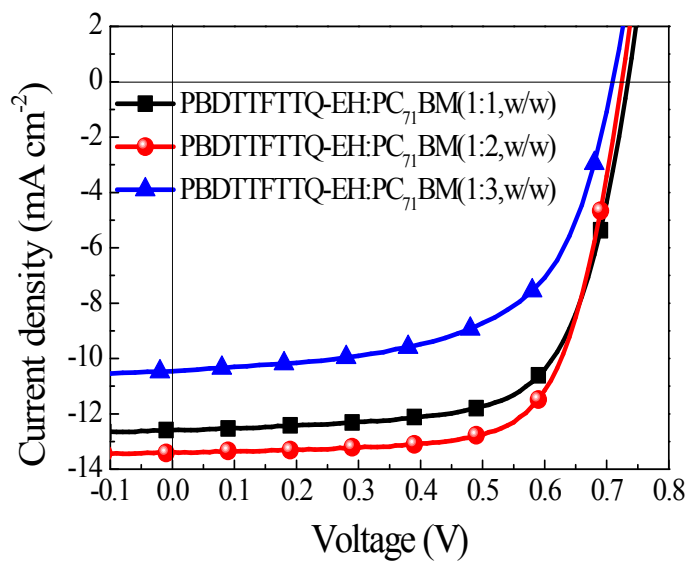

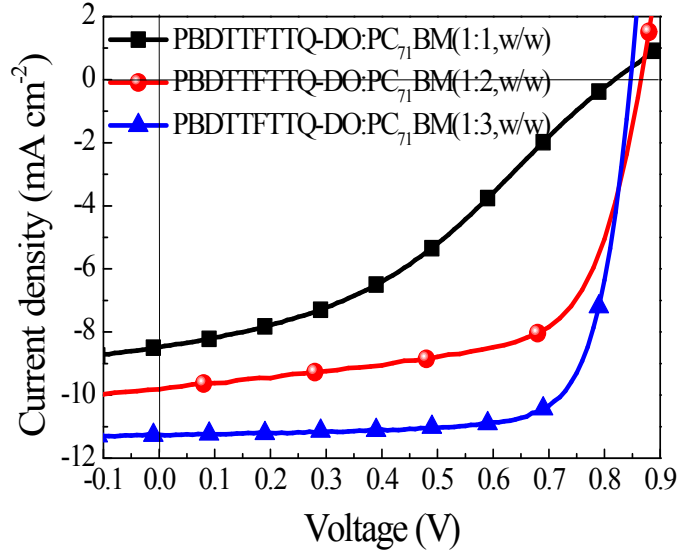

**Figure S10** The J-V curves of PSCs based on the polymer:PC<sub>71</sub>BM with different weight ratios under the illumination of AM 1.5G, 100mW/cm<sup>2</sup>

**Table S1** The photovoltaic performances of the PSCs based on polymer:PC<sub>71</sub>BM with various weight ratios under the illumination of AM 1.5G, 100mW/cm<sup>2</sup>

| Polymer     | D/A [w/w] | V <sub>oc</sub> [V] | J <sub>sc</sub> [mA cm <sup>-2</sup> ] | FF [%] | PCE [%] |
|-------------|-----------|---------------------|----------------------------------------|--------|---------|
| PBDTTFTQ-EH | 1:1       | 0.80                | 12.4                                   | 57.6   | 5.71    |
|             | 1:1.5     | 0.80                | 12.3                                   | 65.4   | 6.47    |
|             | 1:2       | 0.80                | 11.3                                   | 60.6   | 5.46    |
|             | 1:3       | 0.80                | 7.97                                   | 64.8   | 4.14    |
|             | 1:4       | 0.81                | 7.14                                   | 67.3   | 3.89    |
| PBDTTFTQ-DO | 1:1       | 0.83                | 7.54                                   | 39.1   | 2.45    |
|             | 1:2       | 0.88                | 11.2                                   | 68.7   | 6.79    |
|             | 1:3       | 0.88                | 11.4                                   | 75.9   | 7.61    |
|             | 1:4       | 0.87                | 11.2                                   | 72.6   | 7.04    |
| PBDTTFTQ-EH | 1:1       | 0.73                | 12.6                                   | 68.4   | 6.29    |
|             | 1:2       | 0.72                | 13.4                                   | 70.8   | 6.82    |
|             | 1:3       | 0.70                | 10.5                                   | 60.8   | 4.45    |



|             |     |      |      |      |      |
|-------------|-----|------|------|------|------|
|             | 1:1 | 0.82 | 8.48 | 37.9 | 2.64 |
| PBDTTFTQ-DO | 1:2 | 0.86 | 9.82 | 65.0 | 5.49 |
|             | 1:3 | 0.85 | 11.3 | 75.7 | 7.25 |

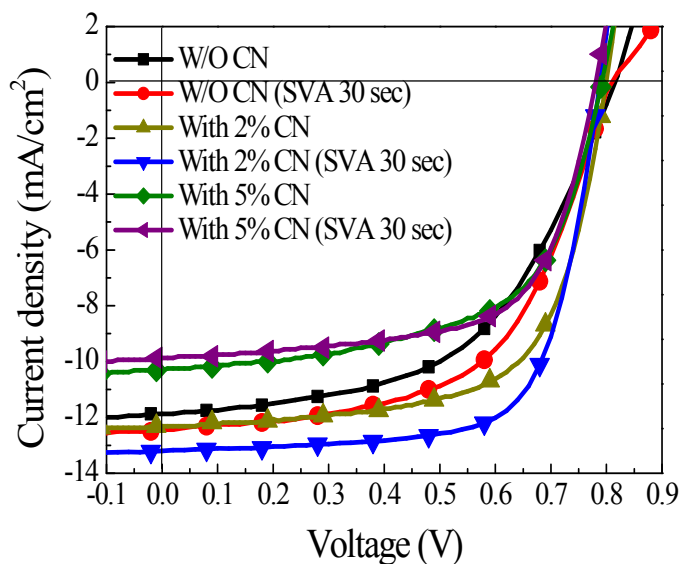

**Figure S11** The J-V curves of the PSCs based on **PBDTTFTQ-EH:PC<sub>71</sub>BM** (1:1.5, wt/wt) with various treated processes under the illumination of AM 1.5G, 100mW/cm<sup>2</sup>

**Table S2** The photovoltaic performances of the PSCs based on **PBDTTFTQ-EH:PC<sub>71</sub>BM** (1:1.5, wt/wt) with various treated processes under the illumination of AM 1.5G, 100 mW cm<sup>-2</sup>

| Additive | Annealing process | Voc [V] | Jsc [mA cm <sup>-2</sup> ] | FF [%] | PCE [%] |
|----------|-------------------|---------|----------------------------|--------|---------|
| W/O      | As cast           | 0.82    | 11.9                       | 52.9   | 5.15    |
|          | SVA 30 sec        | 0.80    | 12.4                       | 57.9   | 5.76    |
| 2% CN    | As cast           | 0.80    | 12.3                       | 65.4   | 6.43    |
|          | SVA 30 sec        | 0.78    | 13.2                       | 70.8   | 7.29    |
| 5% CN    | As cast           | 0.79    | 10.3                       | 59.7   | 4.86    |
|          | SVA 30 sec        | 0.78    | 9.89                       | 64.7   | 4.99    |

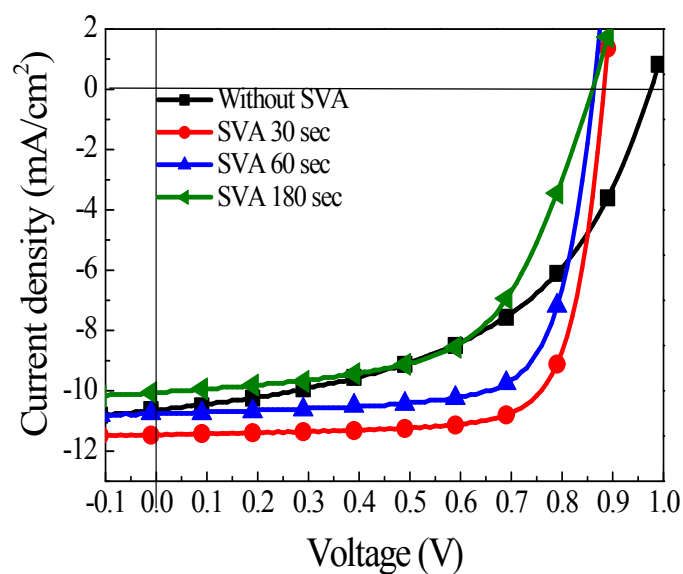

**Figure S12** The J-V curves of the PSCs based on **PBDTTFTQ-DO:PC<sub>71</sub>BM** (1:3, wt/wt) with various THF-SVA times under the illumination of AM 1.5G, 100 mW cm<sup>-2</sup>

**Table S3** The photovoltaic performances of the PSCs based on **PBDTTFTQ-DO:PC<sub>71</sub>BM** (1:3, wt/wt) with various THF-SVA under the illumination of AM 1.5G, 100 mW cm<sup>-2</sup>

| Active layer                             | SVA time | Voc [V] | Jsc [mA cm <sup>-2</sup> ] | FF [%] | PCE [%] |
|------------------------------------------|----------|---------|----------------------------|--------|---------|
| PBDTTFTQ-DO:<br>PC <sub>71</sub> BM(1:3) | 0 sec    | 0.98    | 10.7                       | 49.9   | 5.21    |
|                                          | 30 sec   | 0.88    | 11.4                       | 75.9   | 7.61    |
|                                          | 60 sec   | 0.86    | 10.8                       | 73.3   | 6.78    |
|                                          | 180 sec  | 0.86    | 10.1                       | 58.9   | 5.09    |

### Hole mobility measurement

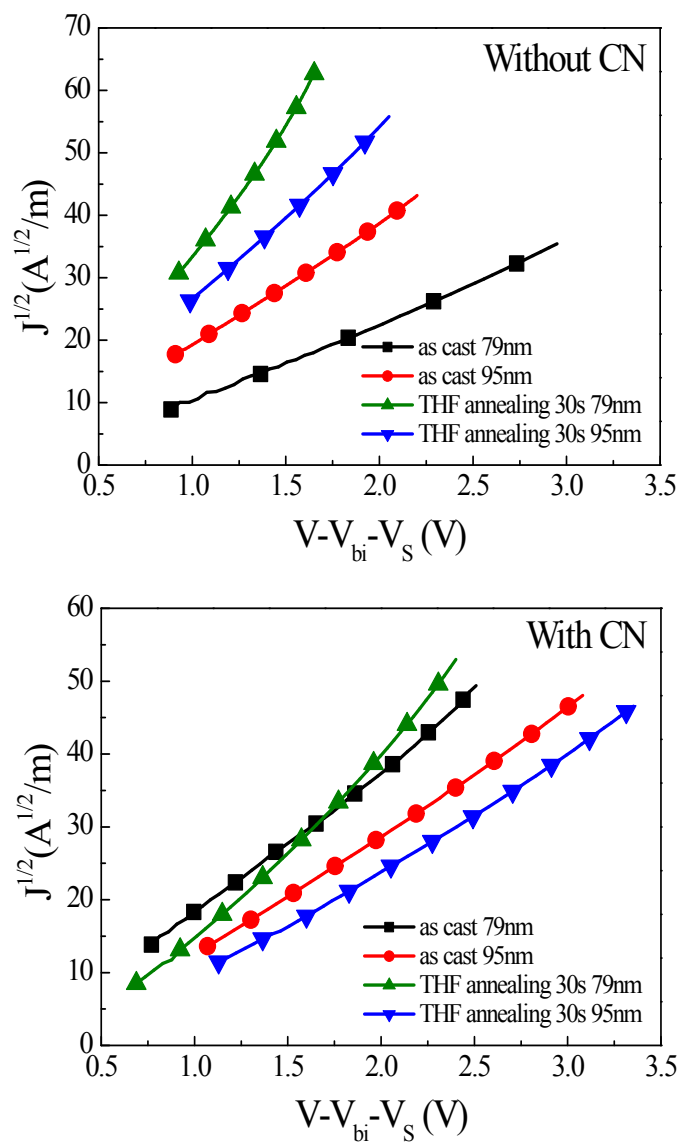

**Figure S13**  $J^{1/2} \sim V$  characteristics of PBDTTFTQ-EH hole-only devices (without and with 2% CN) with different thicknesses measured at ambient temperature

**Table S4** The SCLC mobility of **PBDTTFTQ-EH** films

| Additive   | Treatment   | Thickness (nm) | Hole mobilities ( $\text{cm}^2 \text{V}^{-1} \text{s}^{-1}$ ) |
|------------|-------------|----------------|---------------------------------------------------------------|
| Without CN | As cast     | 79             | $2.65 \times 10^{-5}$                                         |
|            |             | 95             | $1.07 \times 10^{-4}$                                         |
|            | THF-SVA 30s | 79             | $3.14 \times 10^{-4}$                                         |
|            |             | 95             | $2.13 \times 10^{-4}$                                         |
| With 2% CN | As cast     | 83             | $7.58 \times 10^{-5}$                                         |
|            |             | 95             | $8.44 \times 10^{-5}$                                         |
|            | THF-SVA 30s | 83             | $1.29 \times 10^{-4}$                                         |
|            |             | 95             | $7.23 \times 10^{-5}$                                         |

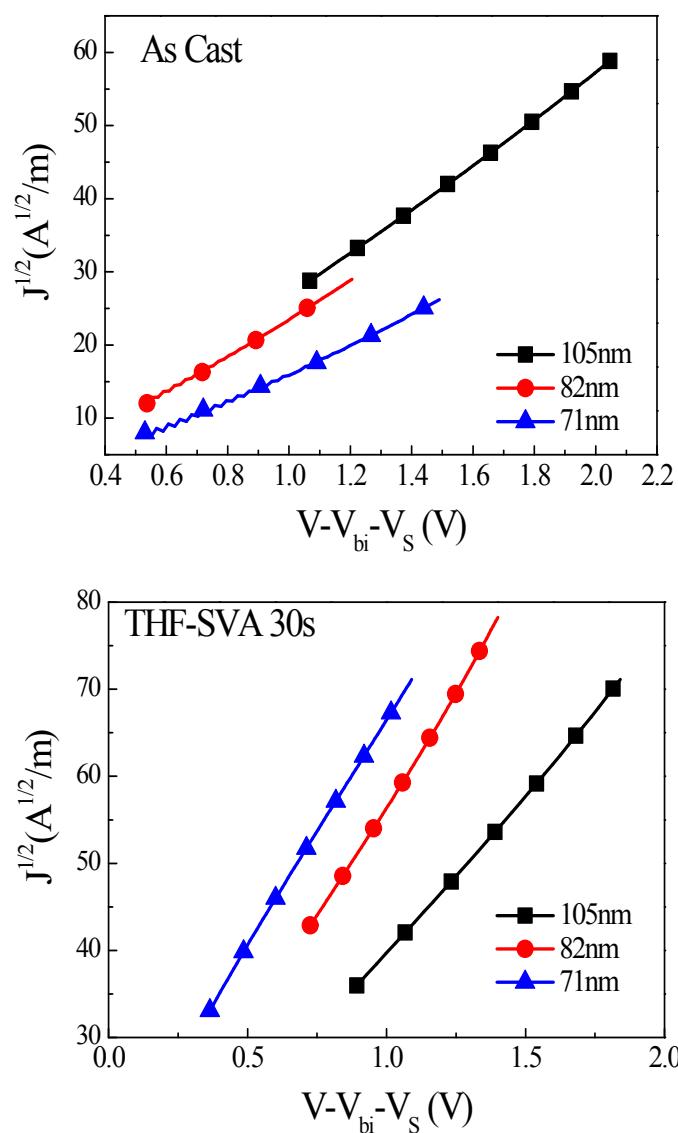

**Figure S14**  $J^{1/2} \sim V$  characteristics of **PBDTTFTQ-DO** hole-only devices with different thicknesses measured at ambient temperature.

**Table S5** The SCLC mobility of **PBDTTFTQ-DO** films

| Treatment   | Thickness (nm) | Hole mobilities ( $\text{cm}^2 \text{V}^{-1} \text{s}^{-1}$ ) |
|-------------|----------------|---------------------------------------------------------------|
| As cast     | 105            | $1.45 \times 10^{-4}$                                         |
|             | 82             | $1.16 \times 10^{-4}$                                         |
|             | 71             | $1.13 \times 10^{-4}$                                         |
| THF-SVA 30s | 105            | $5.28 \times 10^{-4}$                                         |
|             | 82             | $5.03 \times 10^{-4}$                                         |
|             | 71             | $3.23 \times 10^{-4}$                                         |

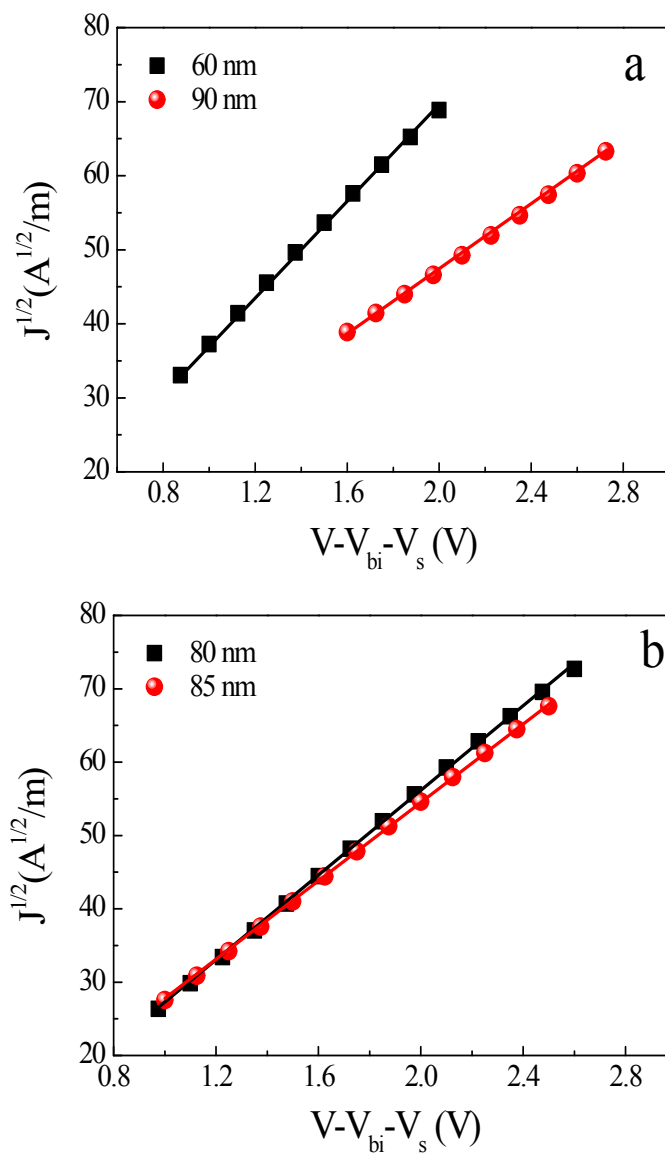

**Figure S15**  $J^{1/2} \sim V$  characteristics of PBDTTFTTQ-EH (a) and PBDTTFTTQ-DO (b) hole-only devices with different thicknesses measured at ambient temperature.

**Table S6** The SCLC mobility of PBDTTFTTQ-EH and PBDTTFTTQ-DO films

after THF SVA 30sec

| Treatment    | Thickness (nm) | Hole mobilities ( $\text{cm}^2 \text{V}^{-1} \text{s}^{-1}$ ) |
|--------------|----------------|---------------------------------------------------------------|
| PBDTTFTTQ-EH | 60             | $7.12 \times 10^{-5}$                                         |
|              | 90             | $1.14 \times 10^{-4}$                                         |
| PBDTTFTTQ-EO | 80             | $1.44 \times 10^{-4}$                                         |
|              | 85             | $1.49 \times 10^{-4}$                                         |
